# Supplementary material
Source: publisher figshare collection journal article supplement (https://frontiersin.figshare.com/ndownloader/files/27944238)
Supplement: Supplementary file 1 [file 27944238]

## Appendix

### Table A: Descriptive statistics of all variables in the analyses

|  | Cases | Min | Max | Mean | SD |
| --- | --- | --- | --- | --- | --- |
| Dependent variables |  |  |  |  |  |
| Satisfaction with local democracy | 2377 | 1 | 4 | 2.78 | 0.62 |
| Satisfaction with national democracy | 2481 | 1 | 4 | 2.75 | 0.66 |
| Trust in government | 2492 | 1 | 4 | 2.53 | 0.88 |
| Trust in parliament | 2468 | 1 | 4 | 2.60 | 0.91 |
| National trust scale | 2458 | 2 | 8 | 4.90 | 1.40 |
| Trust in municipality council | 2372 | 1 | 4 | 2.79 | 0.93 |
| Trust in mayor and aldermen | 2284 | 1 | 4 | 2.88 | 1.02 |
| Local trust scale | 2269 | 2 | 8 | 5.17 | 1.31 |
| Input |  |  |  |  |  |
| Provision of reliable news on local government by local media | 2046 | 0 | 10 | 6.91 | 1.90 |
| Free and fair local elections | 2212 | 0 | 10 | 8.17 | 1.70 |
| Public consultation evenings for residents | 2136 | 0 | 10 | 6.78 | 1.95 |
| Inclusion of all social groups in the municipal council | 1952 | 0 | 10 | 6.16 | 2.22 |
| Statement: Sufficient ways to make opinion heard | 2277 | 1 | 5 | 3.29 | 0.92 |
| Statement: Council members care about public opinion | 2201 | 1 | 5 | 3.13 | 0.98 |
| Throughput |  |  |  |  |  |
| Transparency on the way local government makes decisions | 2053 | 0 | 10 | 6.77 | 2.11 |
| Equal treatment of all groups and individuals | 2033 | 0 | 10 | 7.09 | 1.97 |
| Taking minority positions into account by the municipality | 1965 | 0 | 10 | 6.44 | 1.96 |
| Willingness to compromise by political parties in the council | 1958 | 0 | 10 | 6.77 | 1.73 |
| Output |  |  |  |  |  |
| General satisfaction with municipal services | 2385 | 1 | 10 | 6.59 | 1.44 |
| Satisfaction with care | 2305 | 0 | 10 | 7.10 | 1.64 |
| Satisfaction with sports/play facilities | 2220 | 0 | 10 | 6.94 | 1.62 |
| Satisfaction with public transport | 2273 | 0 | 10 | 6.59 | 1.95 |
| Satisfaction with green space | 2438 | 0 | 10 | 6.55 | 1.94 |
| Satisfaction with public safety | 2425 | 0 | 10 | 6.78 | 1.61 |
| Control variables |  |  |  |  |  |
| Level of education | 2640 | 1 | 6 | 3.73 | 1.48 |
| Gender | 2643 | 1 | 2 | 1.52 | 0.50 |
| Satisfaction with national economy | 2508 | 0 | 10 | 6.63 | 2.08 |
| Satisfaction with personal income | 2461 | 0 | 10 | 5.50 | 1.70 |
| Conditions |  |  |  |  |  |
| Attachment to the municipality | 2624 | 1 | 5 | 2.76 | 0.86 |
| Length of residence in municipality | 2579 | 0 | 98 | 29.75 | 19.92 |
| Local political activism | 2638 | 0 | 1 | 0.23 | 0.42 |
| Local political interest | 2581 | 1 | 3 | 1.66 | 0.60 |

### Table B: Table 1 with individual items instead of sheaf coefficients

|  | Local democratic satisfaction | | | Local political trust | | |
| --- | --- | --- | --- | --- | --- | --- |
|  | b | se |  | b | se |  |
| **Input** |  |  |  |  |  |  |
| Reliable local media | -0,005 | 0,008 |  | 0,015 | 0,017 |  |
| Free and fair local elections | -0,017 | 0,008 | * | -0,037 | 0,017 | * |
| Consultation meetings | -0,011 | 0,007 | † | -0,014 | 0,015 |  |
| Party alternatives | -0,002 | 0,008 |  | 0,038 | 0,017 | * |
| Descriptive representation | -0,006 | 0,006 |  | -0,020 | 0,013 |  |
| MPs care for people | -0,067 | 0,012 | *** | -0,201 | 0,027 | *** |
| Sufficiency of ways for citizens to be heard | -0,001 | 0,012 |  | 0,042 | 0,026 |  |
| **Throughput** |  |  |  |  |  |  |
| Transparency | 0,012 | 0,007 |  | 0,034 | 0,016 | * |
| Equal treatment | 0,028 | 0,008 | *** | 0,015 | 0,017 |  |
| Account for minority positions | 0,009 | 0,008 |  | 0,014 | 0,017 |  |
| Willingness to compromise | 0,023 | 0,008 | ** | 0,030 | 0,018 |  |
| **Output** |  |  |  |  |  |  |
| General appreciation of local provisions | 0,080 | 0,009 | *** | 0,201 | 0,020 | *** |
| Appreciation of healthcare provisions | 0,014 | 0,008 | † | 0,035 | 0,017 | * |
| Appreciation of sports facilities | -0,019 | 0,009 | * | 0,024 | 0,019 |  |
| Appreciation of public transport | 0,016 | 0,006 | * | 0,013 | 0,014 |  |
| Appreciation of village green | 0,000 | 0,007 |  | -0,016 | 0,015 |  |
| Appreciation of local safety | 0,022 | 0,008 | ** | 0,029 | 0,019 |  |
| **National political support** |  |  |  |  |  |  |
| Satisfaction with national democracy | 0,305 | 0,012 | *** |  |  |  |
| Trust in national political institutions |  |  |  | 0,549 | 0,027 | *** |
| **Control variables** |  |  |  |  |  |  |
| Satisfaction with personal financial situation | -0,014 | 0,006 | * | 0,003 | 0,013 |  |
| Satisfaction with national economy | 0,014 | 0,008 | † | -0,039 | 0,018 | * |
| Level of education | 0,007 | 0,007 |  | -0,060 | 0,015 | *** |
| Gender | 0,010 | 0,020 |  | 0,003 | 0,043 |  |
| **Variance estimates** |  |  |  |  |  |  |
| L1 (individuals) | 0,24 | 0,01 |  | 0,93 | 0,02 |  |
| L2 (municipalities) | 0,11 | 0,02 |  | 0,13 | 0,05 |  |

Source: Dutch Local Election Survey 2016

N(L1): 1,995. N(L2): 353

† p<.10 * p<.05 ** p<.01 *** p<.001

### Table C: Robustness check: Table 2 with respectively full listwise, partial listwise, partial imputation and full imputationa

| FULL LISTWISE | | | |  | PARTIAL LISTWISE | | | |  | PARTIAL IMPUTATION | | | |  | FULL IMPUTATION | | | |
| --- | --- | --- | --- | --- | --- | --- | --- | --- | --- | --- | --- | --- | --- | --- | --- | --- | --- | --- |
| **Satisfaction with democracy** |  |  |  |  |  |  |  |  |  |  |  |  |  |  |  |  |  |  |
|  | b | SE |  |  |  | b | SE |  |  |  | b | SE |  |  |  | b | SE |  |
| Local evaluations | 0,22 | 0,02 | *** |  | Local evaluations | 0,21 | 0,01 | *** |  | Local evaluations | 0,22 | 0,01 | *** |  | Local evaluations | 0,21 | 0,01 | *** |
| Satisfaction with nat. democracy | 0,29 | 0,02 | *** |  | Satisfaction with nat. democracy | 0,31 | 0,01 | *** |  | Satisfaction with nat. democracy | 0,31 | 0,01 | *** |  | Satisfaction with nat. democracy | 0,32 | 0,01 | *** |
| Satisfaction with personal finance | -0,02 | 0,01 | * |  | Satisfaction with personal finance | -0,01 | 0,01 | * |  | Satisfaction with personal finance | -0,01 | 0,01 | ** |  | Satisfaction with personal finance | -0,02 | 0,01 | * |
| Satisfaction with nat economy | 0,03 | 0,01 | ** |  | Satisfaction with nat economy | 0,02 | 0,01 | ** |  | Satisfaction with nat economy | 0,02 | 0,01 | * |  | Satisfaction with nat economy | 0,01 | 0,01 |  |
| Level education | -0,01 | 0,01 |  |  | Level education | 0,00 | 0,01 |  |  | Level education | -0,01 | 0,01 |  |  | Level education | 0,00 | 0,01 |  |
| Gender | 0,00 | 0,03 |  |  | Gender | 0,00 | 0,02 |  |  | Gender | 0,01 | 0,02 |  |  | Gender | 0,02 | 0,02 |  |
| **Political trust** |  |  |  |  |  |  |  |  |  |  |  |  |  |  |  |  |  |  |
|  | b | SE |  |  |  | b | SE |  |  |  | b | SE |  |  |  | b | SE |  |
| Local evaluations | 0,62 | 0,03 | *** |  | Local evaluations | 0,59 | 0,03 | *** |  | Local evaluations | 0,56 | 0,03 | *** |  | Local evaluations | 0,54 | 0,02 | *** |
| Trust in nat. political institutions | 0,51 | 0,04 | *** |  | Trust in nat. political institutions | 0,53 | 0,03 | *** |  | Trust in nat. political institutions | 0,55 | 0,03 | *** |  | Trust in nat. political institutions | 0,56 | 0,02 | *** |
| Satisfaction with personal finance | 0,00 | 0,02 |  |  | Satisfaction with personal finance | 0,00 | 0,02 |  |  | Satisfaction with personal finance | 0,00 | 0,01 |  |  | Satisfaction with personal finance | 0,00 | 0,01 |  |
| Satisfaction with nat economy | -0,03 | 0,02 |  |  | Satisfaction with nat economy | -0,03 | 0,02 |  |  | Satisfaction with nat economy | -0,04 | 0,02 |  |  | Satisfaction with nat economy | -0,03 | 0,02 | * |
| Level education | -0,07 | 0,02 | * |  | Level education | -0,07 | 0,02 | * |  | Level education | -0,06 | 0,02 | * |  | Level education | -0,05 | 0,01 | * |
| Gender | 0,00 | 0,06 |  |  | Gender | -0,03 | 0,05 |  |  | Gender | 0,00 | 0,04 |  |  | Gender | 0,00 | 0,04 |  |
